# Supplementary material
Source: publisher figshare collection journal article supplement (https://frontiersin.figshare.com/ndownloader/files/12713579)
Supplement: Supplementary file [file 12713579]

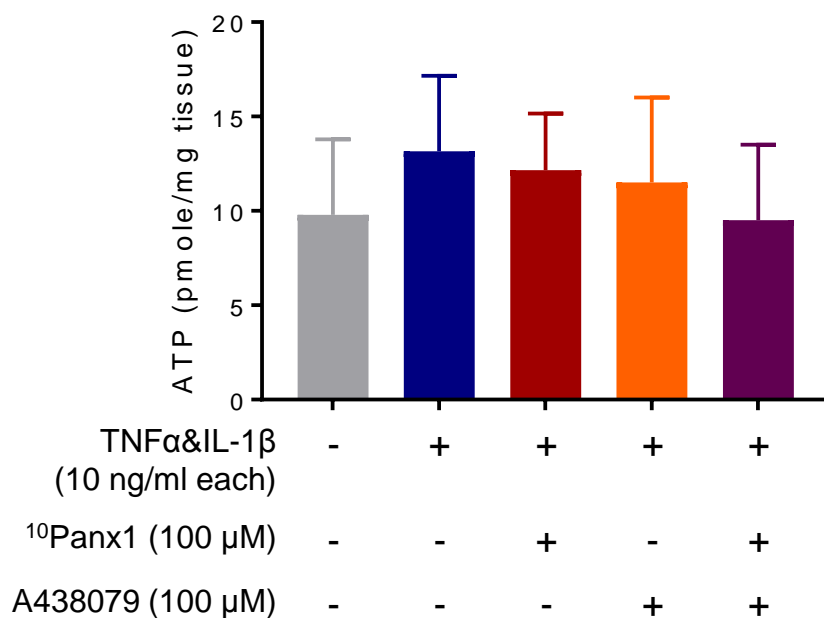

**Supp Figure 4.** Level of ATP from bath fluid of the colitis model. ATP released from the colonic mucosal tissues of the five treatment groups incubated over 16 h in bath fluid were measured by using the ATP Bioluminescence method. One-way ANOVA analysis did not reveal statistical significance between treatment groups.
